# Supplementary material
Source: HighWire-hosted journal article supplement (https://ard.bmj.com/content/76/3/562)
Supplement: inline-supplementary-material-4 [file inline-supplementary-material-4.pdf]

Figure S1. Distribution of different durations and levels of remission in the entire cohort (remitted plus unremitted patients).

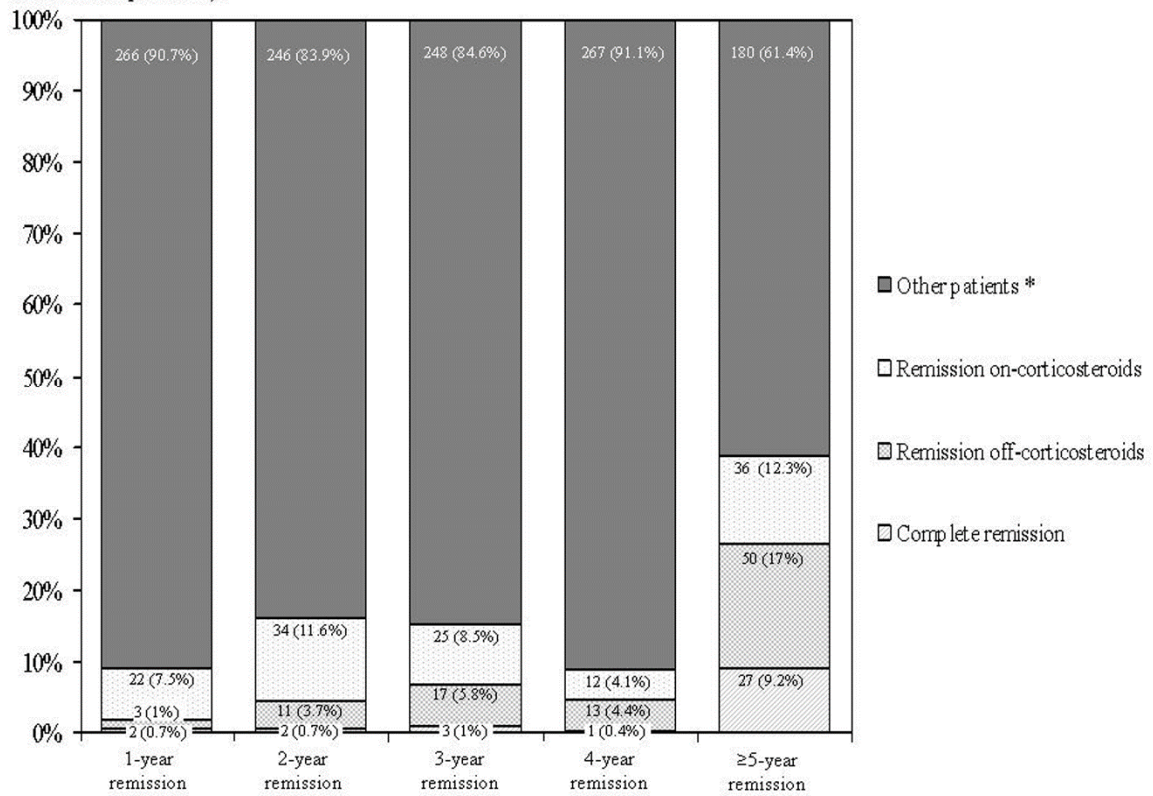

\* In each column, "other patients" include unremitted and remitted patients with a different duration of remission.
